# Supplementary material for: Gastroprotective effect and mechanisms of Chinese sumac fruits (Rhus chinensis Mill.) on ethanol-induced gastric ulcers in mice
Source: Royal Society of Chemistry journal article supplement (doi:10.1039/d1fo02864b), 2021-01-01

## SUPPORTING INFORMATION

### **Gastroprotective effect and mechanisms of Chinese sumac fruits (*Rhus chinensis* Mill.) against ethanol-induced gastric ulcer in mice**

Yilin Sun, Nan Ma, Junjie Yi, Linyan Zhou, Shengbao Cai\*

Faculty of Food Science and Engineering, Kunming University of Science and Technology, Kunming, Yunnan Province, People's Republic of China, 650500;

#### **\* Corresponding author and proofs**

Shengbao Cai

E-mail address: caikmust2013@kmust.edu.cn or caikmust2013@163.com

## **Characterization of the major bioactive compounds in the ethanol extract of Chinese sumac fruits**

The major bioactive compounds in the ethanol extract of Chinese sumac fruits were separated by using a Thermo Fisher Ultimate 3000 UHPLC System (Thermo Fisher Scientific, Germany) coupled with an Agilent Zorbax SB-C18 column (1.7  $\mu\text{m}$ , 2.1 mm  $\times$  100 mm), and then characterized by a high resolution mass spectrometer (Q-Exactive Orbitrap, Thermo Fisher Scientific, Bremen, Germany) in the negative mode. The parameters of HPLC were set as follows: mobile phases, 0.1% formic acid in water (A) and acetonitrile (B); flow rate, 0.1 mL/min; elution procedure, 0–2min, 5% B; 2–4min, 5%–30% B; 4–6min, 30%–38% B; 6–9min, 38% B; 9–10min, 38%–5% B; 10–12min, 5% B; column temperature, 30°C; volume of sample injection, 2.0  $\mu\text{l}$ . The following Mass parameters were used in the current work: full MS scan range, 50–1000 m/z; auxiliary gas flow, 9 L/min; sheath gas flow rate, 33 L/min; sweep gas, 4 L/min; S-lens RF level, 50%; spray voltage, 3.3 kV, capillary temperature, 330 °C; heater temperature, 360 °C.

**Fig. S1** The chromatograms of ethanol extract of Chinese sumac fruits. Peaks identification and their MS data are shown in Table S1. The base peak chromatogram is shown in Fig. A.

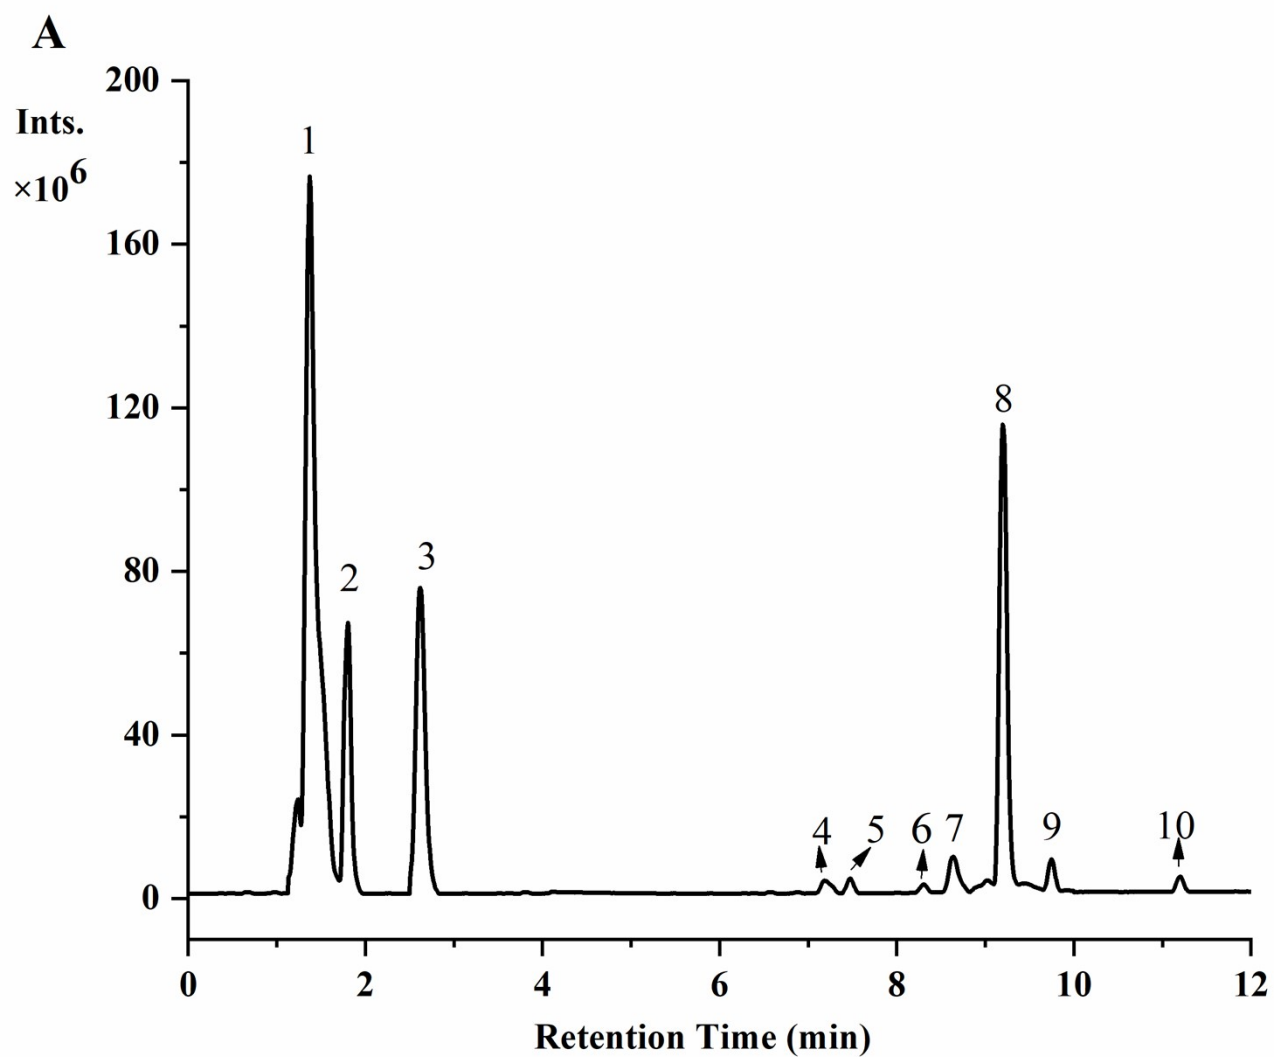

**Table S1** Phenolic compounds identified in *Rhus chinensis* Mill. fruits by UHPLC-ESI-HRMS/MS in negative mode.

| Peak No. | Compounds                         | Molecular formula                               | Retention time (min) | [M-H] <sup>-</sup> ( <i>m/z</i> ) | MS/MS ion fragments          | Dry extract (μg/g) | Average percentage (%; Total identified phenolic content) |
|----------|-----------------------------------|-------------------------------------------------|----------------------|-----------------------------------|------------------------------|--------------------|-----------------------------------------------------------|
| 1        | Malic acid                        | C <sub>4</sub> H <sub>6</sub> O <sub>5</sub>    | 1.37                 | 133.0132                          | 127.7918, 129.2748           | ---                | ---                                                       |
| 2        | Citric acid                       | C <sub>6</sub> H <sub>8</sub> O <sub>7</sub>    | 1.80                 | 191.0190                          | 111.0078                     | ---                | ---                                                       |
| 3        | Gallic acid                       | C <sub>7</sub> H <sub>6</sub> O <sub>5</sub>    | 2.62                 | 169.0134                          | 123.0072, 124.0154           | 3641.46 ± 185.36   | 50.66                                                     |
| 4        | Trigalloylglucose I               | C <sub>27</sub> H <sub>24</sub> O <sub>18</sub> | 7.19                 | 635.0899                          | 125.0232, 169.0134           | 199.15 ± 22.37     | 2.77                                                      |
| 5        | Trigalloylglucose II              | C <sub>27</sub> H <sub>24</sub> O <sub>18</sub> | 7.48                 | 635.0901                          | 125.0232, 169.0134           | 178.36 ± 16.54     | 2.48                                                      |
| 6        | Tetragalonyl glucose              | C <sub>34</sub> H <sub>28</sub> O <sub>22</sub> | 8.31                 | 787.1011                          | 169.0134, 295.0461           | 150.68 ± 19.63     | 2.10                                                      |
| 7        | Myricetin-3- <i>O</i> -rhamnoside | C <sub>21</sub> H <sub>20</sub> O <sub>12</sub> | 8.64                 | 463.0889                          | 271.0250, 255.0298           | 446.15 ± 29.88     | 6.21                                                      |
| 8        | Quercetin-3- <i>O</i> -rhamnoside | C <sub>21</sub> H <sub>20</sub> O <sub>11</sub> | 9.20                 | 447.0936                          | 255.0297, 151.0026, 178.9978 | 2277.80 ± 191.39   | 31.69                                                     |
| 9        | Kaempferol-3- <i>O</i> -hexoside  | C <sub>21</sub> H <sub>20</sub> O <sub>10</sub> | 9.75                 | 431.0986                          | 227.0346, 229.0544, 228.0385 | 169.24 ± 18.92     | 2.35                                                      |
| 10       | Quercetin                         | C <sub>15</sub> H <sub>10</sub> O <sub>6</sub>  | 11.20                | 301.0358                          | 65.0019, 121.0283            | 125.23 ± 17.74     | 1.74                                                      |

Values are expressed as the mean ± S.D. (*n* = 3, μg/g of dry extract); each standard curve was set with five different concentrations from 5.00 to 100.00 μg/mL depending on the response intensity. Gallic acid standard was used for quantifying the compounds 3,4,5 and 6; myricetin-3-*O*-rhamnoside standard was used for quantifying the compounds 7; quercetin-3-*O*-rhamnoside standard was used for quantifying the compounds 8; kaempferol standard was used for quantifying the compounds 9; quercetin standard was used for quantifying the compound 10. All the phenolic standards were purchased from Must bio-technology CO., LTD (Chengdu, Sichuan, China) with purity ≥97%.

Raw images of western blot in Figure 4

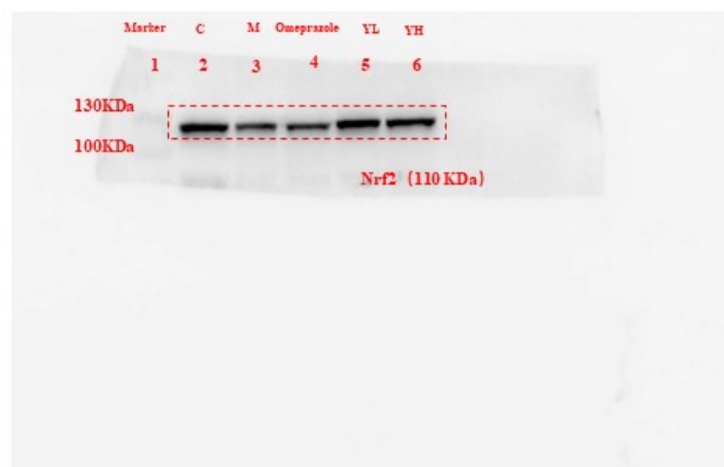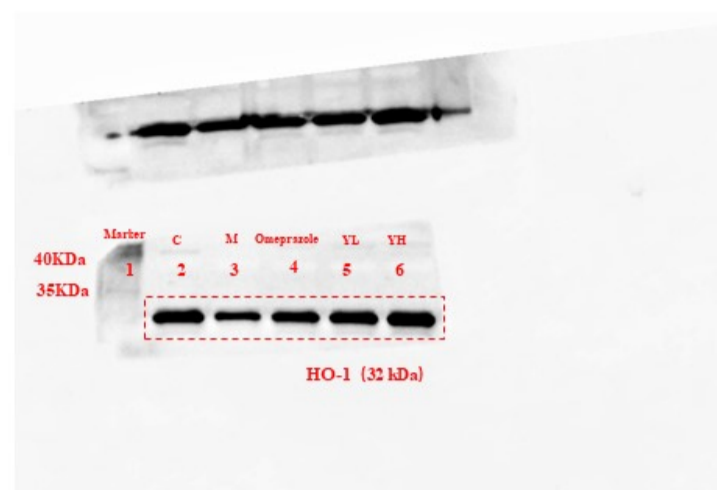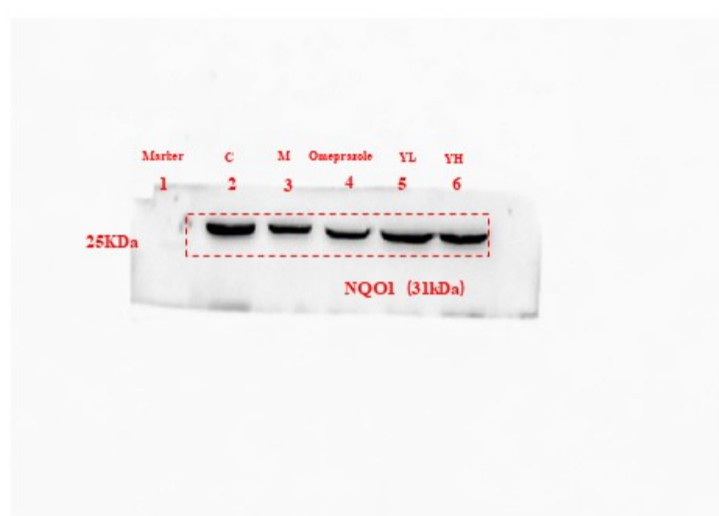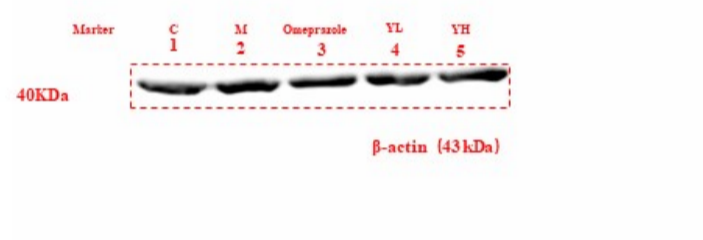

Raw images of western blot in Figure 7

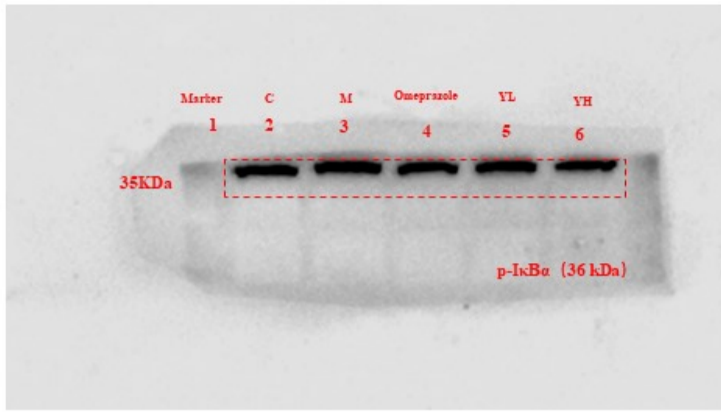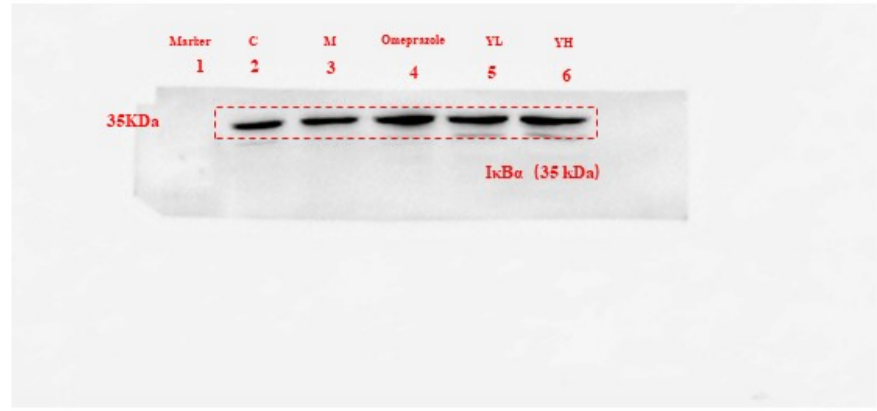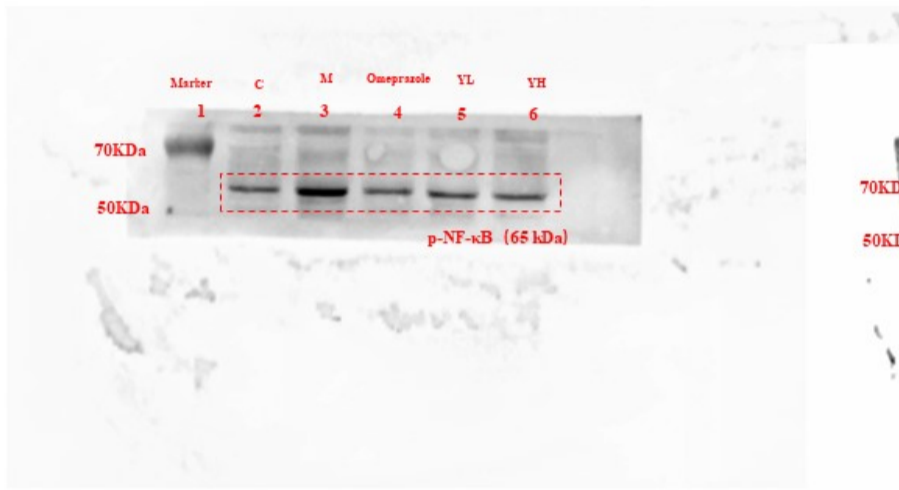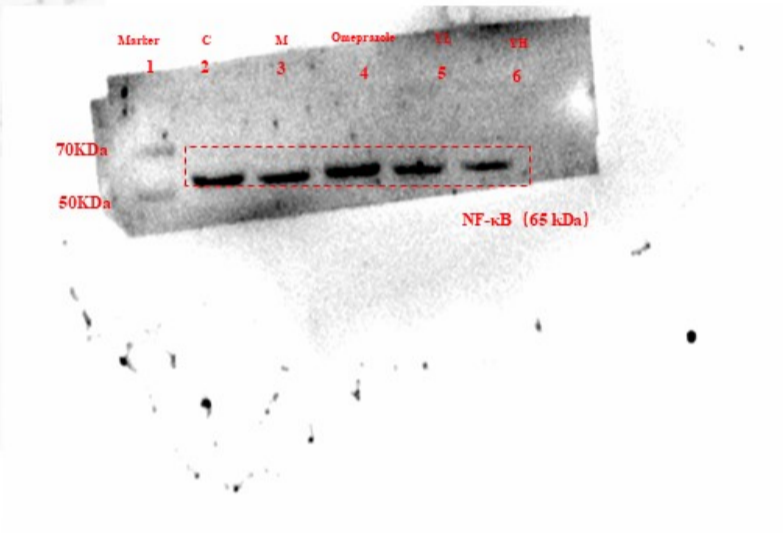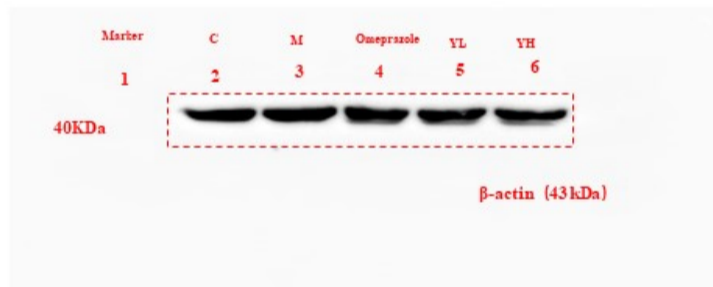

Raw images of western blot in Figure 8 (continued)

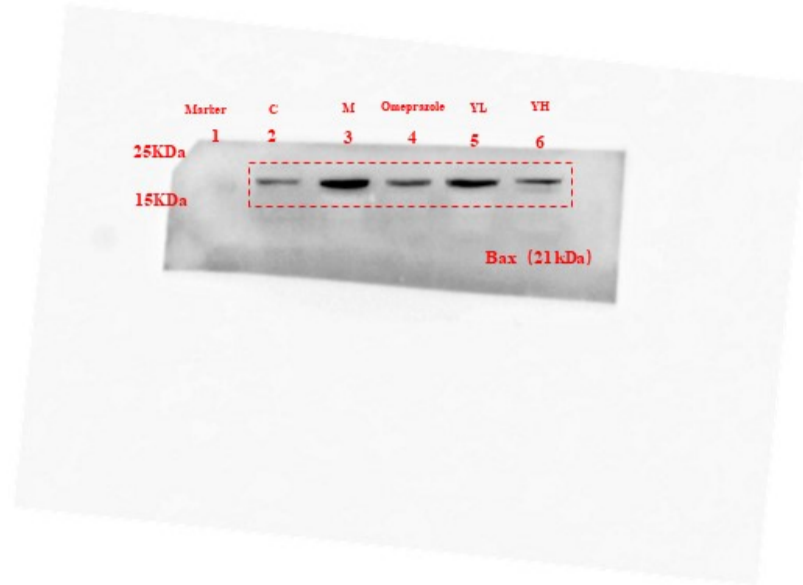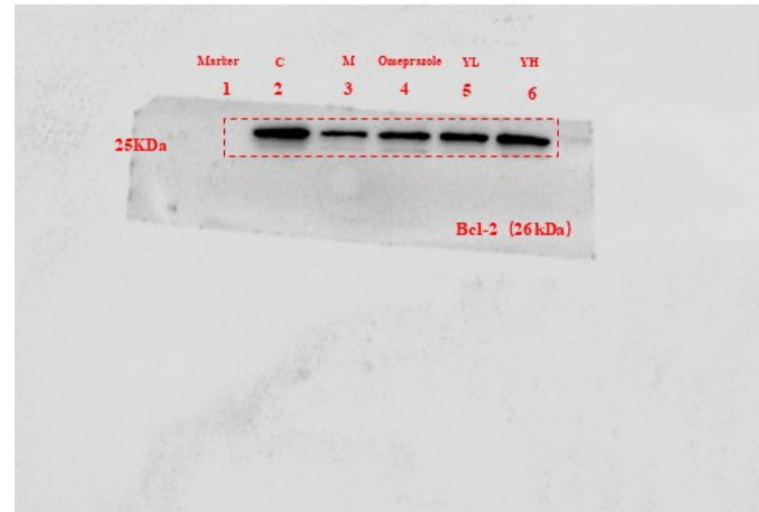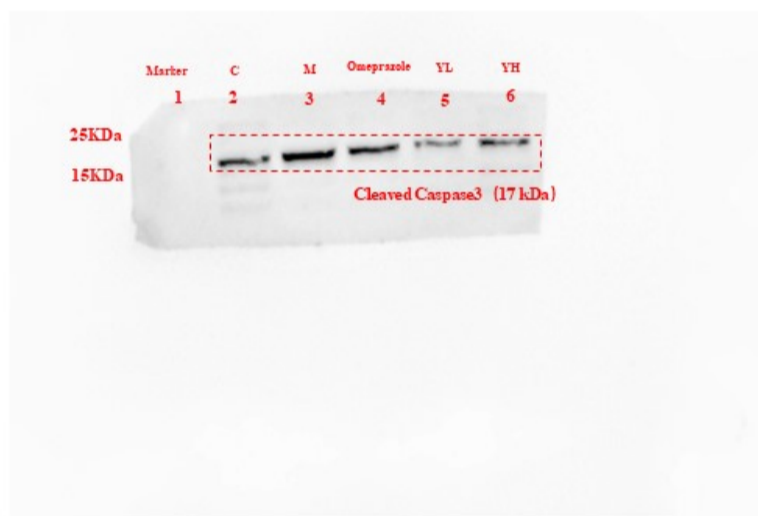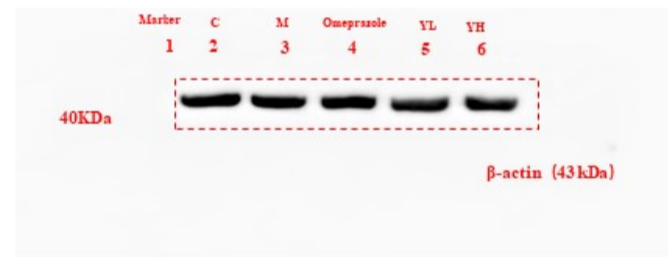

Supplement: d1fo02864b1.pdf [file d1fo02864b1.pdf]
